# Supplementary material for: Correction to “Synthesis of Highly Porous 3D Cerium Oxide Networks Designed for Catalytic Applications”
Source: PubMed Central journal article supplement (PMC11583198; doi:10.1021/acs.cgd.4c01361), 2024-11-01
Supplement: cg4c01361_si_001.pdf [file cg4c01361_si_001.pdf]

## Supporting Information:

### Synthesis of highly porous 3D cerium oxide networks designed for catalytic applications

Jonas Lumma<sup>1\*</sup>, Tim Tjardts<sup>2</sup>, Erik Greve<sup>1</sup>, Lena M. Saure<sup>1</sup>, Salih Veziroglu<sup>2,3</sup>, Rainer Adelung<sup>1,3</sup>, Lorenz Kienle<sup>3,4</sup>, Niklas Wolff<sup>3,4\*</sup>, Fabian Schütt<sup>1,3\*</sup>

<sup>1</sup>*Functional Nanomaterials, Department of Materials Science, Kiel University, 24143 Kiel, Germany*

<sup>2</sup>*Chair for Multicomponent Materials, Department of Materials Science, Kiel University, 24143 Kiel, Germany*

<sup>3</sup>*Kiel Nano, Surface and Interface Science KiNSIS, Kiel University, 24118 Kiel, Germany*

<sup>4</sup>*Synthesis and Real Structure, Department of Materials Science, Kiel University, 24143 Kiel, Germany*

*\*corresponding authors: fas@tf.uni-kiel.de, niwo@tf.uni-kiel.de, jlu@tf.uni-kiel.de*

## Supplementary Note 1. Evaluation of the specific surface area of Aero-Ce<sub>1-x</sub>Zn<sub>x</sub>O<sub>2-δ</sub> and t-ZnO networks.

With standard techniques e.g BET the specific surface area of lightweight framework structure with a high free volume (>90%) is hard to measure, because the amount of material per volume and thus the amount of surface per volume is low. However, the surface area of Aero-Ce<sub>1-x</sub>Zn<sub>x</sub>O<sub>2-δ</sub> can be estimated with the following calculation. This type of calculation has been used before e.g., for the determination of the surface area of graphene foams grown by nickel foam assisted CVD.<sup>[1]</sup>

1. The density of a ZnO template is  $\approx 0.3 \text{ g cm}^{-3}$  with a porosity of  $\approx 94 \%$
2. For  $1 \text{ cm}^3$  the mass of ZnO is 0.3 g.
3. The filled volume can be determined by dividing through the density of ZnO ( $\approx 5.61 \text{ g cm}^{-3}$ ) and is  $\approx 0.053 \text{ cm}^3$ .
4. The t-ZnO-template consists of massive ZnO rods with a mean diameter of  $\approx 3 \mu\text{m}$  and length of  $27 \mu\text{m}$ . Each ZnO rod has a volume of  $\approx 1.908 \times 10^{-10} \text{ cm}^3$ .
5. The total number of ZnO rods can be determined by dividing the volume of ZnO in the template by the volume of a ZnO rod and is  $\approx 2.8 \times 10^{10}$ .
6. Assuming a smooth surface, each rod has a surface area of  $\approx 2.615 \times 10^{-10} \text{ m}^2$ . This results in a ZnO template surface area of  $\approx 0.073 \text{ m}^2 \text{ cm}^{-3}$  and a specific surface area of  $0.244 \text{ m}^2 \text{ g}^{-1}$ .
7. Because Aero-Ce<sub>1-x</sub>Zn<sub>x</sub>O<sub>2-δ</sub> is based on the ZnO templates, consisting of hollow tubes instead of ZnO rods, the number of tubes should be equal to the number of rods. Since the tubes are hollow, the surface area for Aero-Ce<sub>1-x</sub>Zn<sub>x</sub>O<sub>2-δ</sub> can be doubled.
8. The volumetric surface area for Aero-Ce<sub>1-x</sub>Zn<sub>x</sub>O<sub>2-δ</sub> is therefore  $0.1465 \text{ m}^2 \text{ cm}^{-3}$ . The surface area can be normalized by the density of the Aero-Ce<sub>1-x</sub>Zn<sub>x</sub>O<sub>2-δ</sub>, which varies from  $\approx 12 \text{ mg cm}^{-3}$  up to  $\approx 465 \text{ mg cm}^{-3}$  and is between  $0.3 \text{ m}^2 \text{ g}^{-1}$  and  $12 \text{ m}^2 \text{ g}^{-1}$ . However, the SEM images of Aero-Ce<sub>1-x</sub>Zn<sub>x</sub>O<sub>2-δ</sub> show a rather rough surface structure, which increases the surface in comparison to a flat tube surface. Therefore, the calculated surface areas should represent a lower limit.

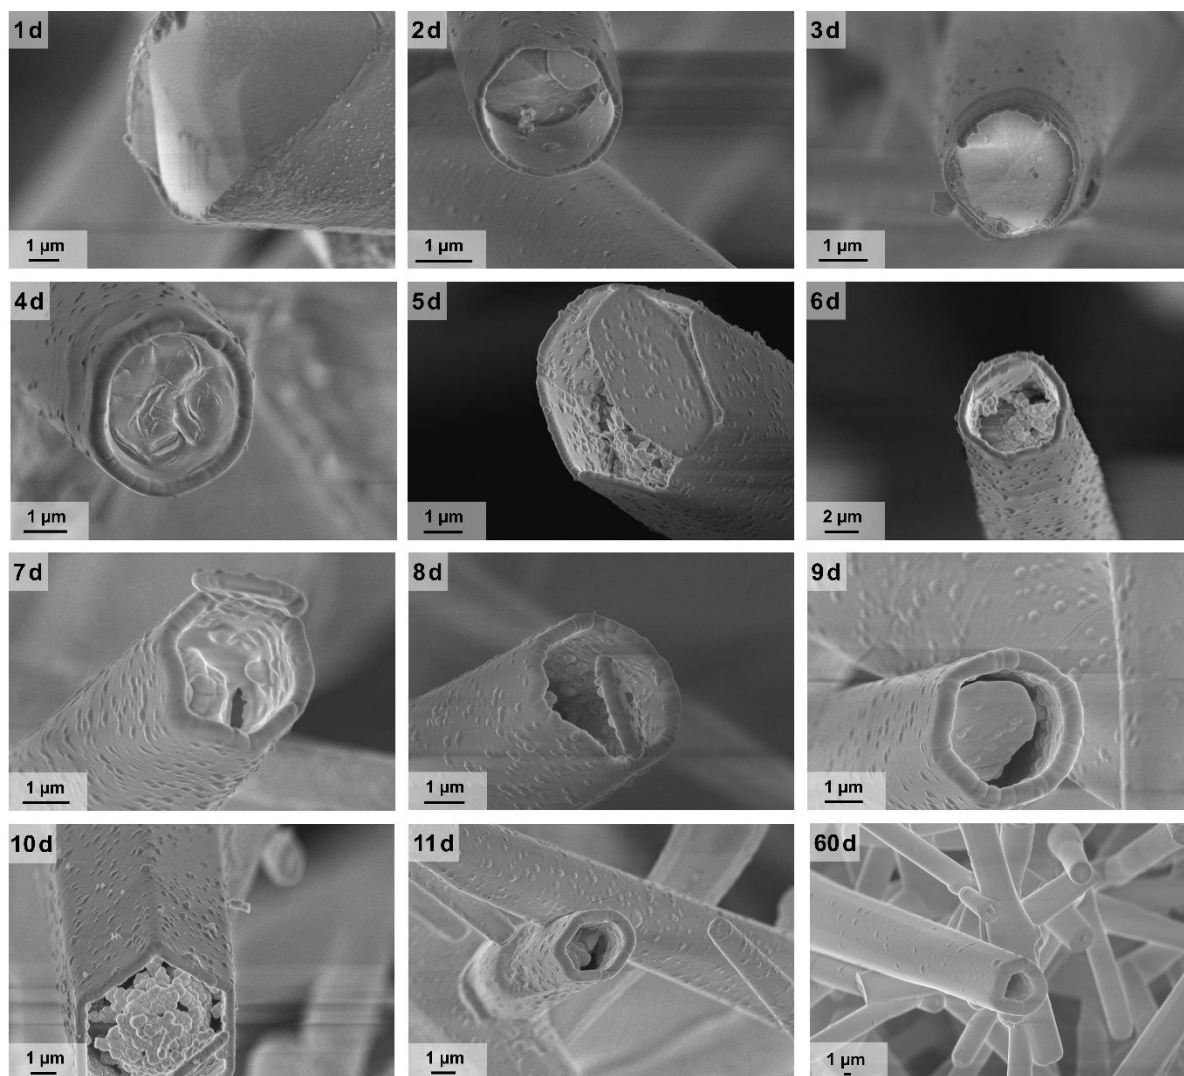

**Figure SI 1:** SEM images of t-ZnO covered with a film of  $Ce_{1-x}Zn_xO_{2-\delta}$  after reaction times from 1 day to 11 days and after 60 days in 0.05 M cerium nitrate precursor solution.

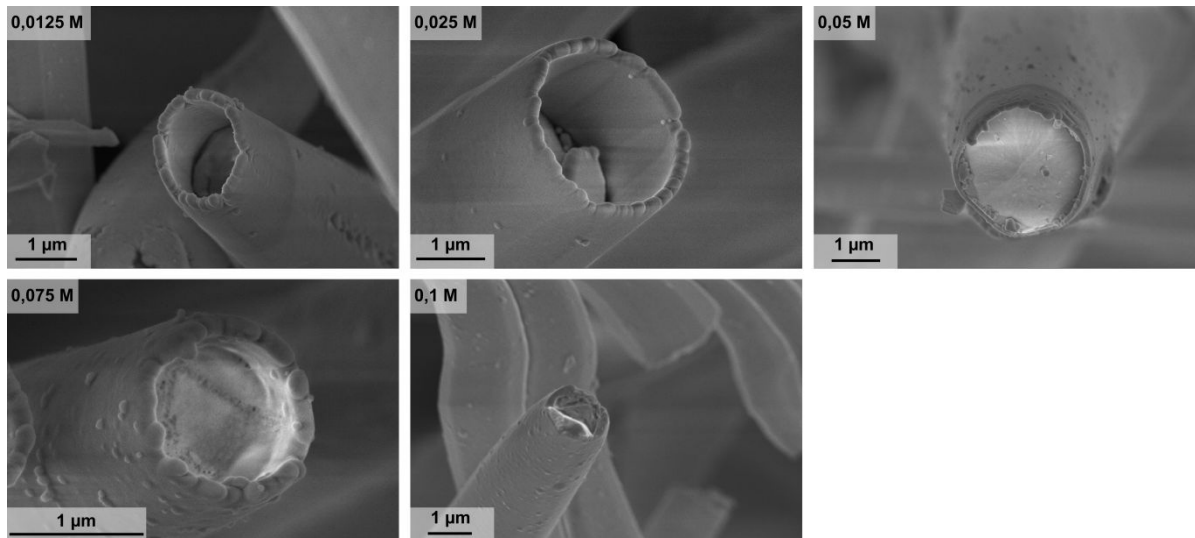

**Figure SI 2:** SEM images of t-ZnO covered with a film of  $Ce_{1-x}Zn_xO_{2.5}$  after reaction times of 3 days with different precursor solution concentrations.

### Film Thickness and Weight for different concentrations

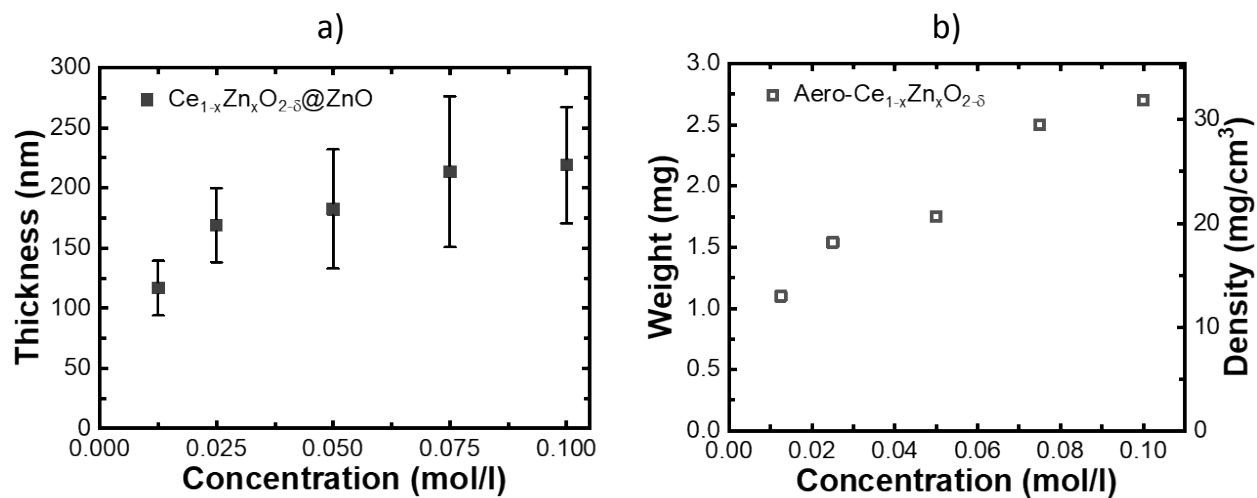

**Figure SI 3:** Adjustability of Aero- $Ce_{1-x}Zn_xO_{2.5}$  wall thickness through different concentrations. a) Thickness of Aero- $Ce_{1-x}Zn_xO_{2.5}$  depending on the reaction time b) and weight and density of cylindrical (height 3 mm; radius 3 mm) Aero- $Ce_{1-x}Zn_xO_{2.5}$  samples.

## XPS Widescreen

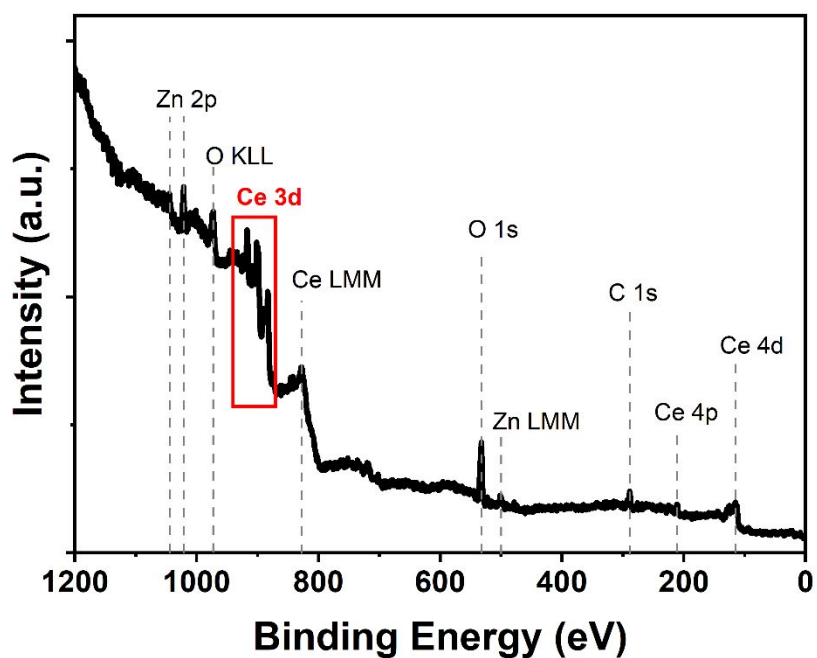

*Figure SI 4:* XPS Wide scan of an Aero-Ce<sub>1-x</sub>Zn<sub>x</sub>O<sub>2.5</sub> sample with indicated elemental peaks and Auger lines; the presence of Ce 3d is marked in red.

*Table SI 1:* Elemental Composition of the Aero-Ce<sub>1-x</sub>Zn<sub>x</sub>O<sub>2.5</sub> calculated from integration of XPS peaks under the consideration of the respective sensitivity factors.

| Element | Peak used for Analysis | Relative Amount/at% |
|---------|------------------------|---------------------|
| C       | C 1s                   | 18.8                |
| O       | O 1s                   | 51.3                |
| Ce      | Ce 3d                  | 22.0                |
| Zn      | Zn 2p                  | 7.9                 |

**Table SI 2:** List of used chemicals.

| <b>Chemical</b>                 | <b>Producer</b>         | <b>CAS Number</b> |
|---------------------------------|-------------------------|-------------------|
| Cerium(III) nitrate hexahydrate | Sigma-Aldrich           | 10294-41-4        |
| Polyvinylpyrrolidone            | Sigma-Aldrich           | 9003-39-8         |
| Ethylene glycol                 | Carl Roth GmbH & Co. KG | 107-21-1          |
| Rhodium(III) chloride hydrate   | Sigma-Aldrich           | 10049-07-7        |
| Tetrapodal zinc oxide           | CAU Kiel                | -                 |
| Acidic acid 100 %               | Carl Roth GmbH & Co. KG | 64-19-7           |
| Ethanol                         | Carl Roth GmbH & Co. KG | 64-17-5           |
| Abs. Ethanol                    | Carl Roth GmbH & Co. KG | 64-17-5           |
| Acetone 99,5 %                  | Carl Roth GmbH & Co. KG | 67-64-1           |
| Propylen oxide                  | Sigma Aldrich           | 75-56-9           |
| Citric Acid                     | Sigma Aldrich           | 77-92-9           |

**Table SI 3:** List of used devices.

| <b>Device</b>                    | <b>Producer</b> | <b>Name</b>    |
|----------------------------------|-----------------|----------------|
| Scanning Electron Microscope     | Zeiss           | Ultra 55 Plus  |
| Transmission Electron Microscope | FEI             | Tecnai F30     |
|                                  | JEOL            | ARM200F NEOARM |

|                               |                    |                   |
|-------------------------------|--------------------|-------------------|
| XRD                           | Rigaku             | Smartlab          |
| Oven                          | Carbolite          | Gero 30-3000°C    |
| Critical Point Dryer          | Leica              | CPD 300           |
| Heating Plate /Magnet Stirrer | IKA                | C-MAG HP7         |
| pH Meter                      | Mettler Toledo     | FiveGo            |
| Reflux Condenser              | Julabo             | F25               |
| XPS                           | Prevac Sp. z o. o. | XPS UHV system    |
| Flow transmitter              | Festo              | SFTE-5U-Q4-B-2.5K |
| Manometer                     | PCE Instruments    | PCE-PDA 1L        |

## References

<sup>[1]</sup> Chen, Z.; Ren, W.; Gao, L.; Liu, B.; Pei, S.; Cheng, H.-M. Three-dimensional flexible and conductive interconnected graphene networks grown by chemical vapour deposition. *Nature materials* **2011**, *10*(6), 424–428. DOI: 10.1038/NMAT3001. Published Online: Apr. 10, 2011.
